# Supplementary material for: Spectral characteristics of a Nd3+/Yb3+:YPO4 single crystal with strong multi-wavelength emission
Source: Royal Society of Chemistry journal article supplement (doi:10.1039/d1ce01452h), 2021-01-01
Supplement: d1ce01452h1.pdf [file d1ce01452h1.pdf]

## Spectral characteristics of Nd<sup>3+</sup>/Yb<sup>3+</sup>:YPO<sub>4</sub> single crystal with strong multi-wavelength emission

Yang Che<sup>‡a</sup>, Fei Zheng<sup>‡a</sup>, Jingyao Lu<sup>a</sup>, Yanzhen Yin<sup>a</sup>, Zhen Wang<sup>a</sup>, Degao Zhong<sup>abc</sup>, Shijia Sun<sup>\*ab</sup> and Bing Teng<sup>\*abc</sup>

<sup>a</sup> College of Physics, University-Industry Joint Center for Ocean Observation and Broadband Communication, Qingdao University, Qingdao 266071, China

<sup>b</sup> National Demonstration Center for Experiment Applied Physics Education (Qingdao University), Qingdao 266071, China

<sup>c</sup> Shandong Provincial University Key Laboratory of Optoelectrical Material Physics and Devices, Qingdao 266071, China

\* Corresponding author. E-mail: ssj1027@126.com (Shijia Sun), 5108tb@163.com (Bing Teng)

† Electronic supplementary information (ESI) available: The reaction formula, calculation of emission cross-sections,  $I_{sat}$ ,  $\beta_{min}$  and  $I_{min}$ . See DOI: 10.1039/x0xx00000x

‡ Yang Che and Fei Zheng contributed equally to this work.

**Eqn. S1** PbHPO<sub>4</sub> decomposes chemical reaction equation.

**Eqn. S2** Nd<sub>x</sub>:Yb<sub>y</sub>:Y<sub>(1-x-y)</sub>PO<sub>4</sub> synthesis chemical reaction equation.

**Calculations of emission cross-sections. (Equations S3-S5)**

**Calculations of  $I_{sat}$ ,  $\beta_{min}$  and  $I_{min}$ . (Equations S6-S8)**

**Eqn. S1**  $PbHPO_4$  decomposes chemical reaction equations.

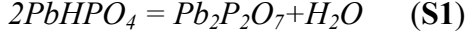

**Eqn. S2**  $Nd_x:Yb_y:Y_{(1-x-y)}PO_4$  synthesis chemical reaction equation.

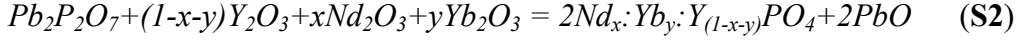

Where  $x=0.8$  at.%,  $y=2.0$  at.%.

### Calculations of emission cross-sections.

We calculated the emission cross section of  $Nd^{3+}$  and  $Yb^{3+}$  ions by RM method formula (S3) and F-L method formula (S5), respectively.

$$\sigma_{em}^i(\lambda) = \frac{3\sigma_{abs}^i \exp(-hc/kT\lambda)}{8\pi n^2 \tau_{rad} c \sum_j \lambda^{-4} \sigma_{abs}^j(\lambda) \exp(-hc/(kT\lambda)) d\lambda} \quad (S3)$$

$h$  is the Planck constant,  $c$  is the speed of light in vacuum,  $k$  is the Boltzmann constant,  $T$  is absolute temperature,  $n$  is the refractive index,  $\tau_{rad}$  is the radiation lifetime, which can be calculated by the following formula.

$$\tau_{rad} = \frac{3}{8\pi n^2 c} \frac{Z_l \sum_j \lambda^{-4} \sigma_{abs}^j(\lambda) \exp(-hc/(k_B T \lambda))}{Z_u \sum_j \lambda^{-4} \sigma_{abs}^j(\lambda) \exp(-hc/(k_B T \lambda)) d\lambda} \quad (S4)$$

$Z_u$  is the high energy level group,  $Z_l$  is the low energy level group, where  $g_k$  is the degeneracy of each sub level,  $k_B$  is Boltzmann constant.

$$\sigma_{em}^{F-L}(\lambda) = \frac{\lambda^5}{8\pi n^2 c \tau_{rad}} \frac{I(\lambda)}{\int \lambda I(\lambda) d\lambda} \quad (S5)$$

$I(\lambda)$  represents the optical density.

### Calculations of $I_{sat}$ , $\beta_{min}$ and $I_{min}$ .

$I_{sat}$  represents the pump saturation intensity, which is a measure of the ease with which the  $\text{Yb}^{3+}$  ions population must be bleached to overcome the ground state absorption, is given by the equation:

$$I_{sat} = hc / [\lambda_p \sigma_{abs}(\lambda_p) \tau_f] \quad (\text{S6})$$

Where  $\lambda_p$  is the pump wavelength,  $h$  is the Planck constant,  $\sigma_{abs}(\lambda_p)$  is absorption cross-sections at the pump wavelength  $\lambda_p$ .

The minimum fraction of  $\text{Yb}^{3+}$  ions that must be excited such that the ground state absorption and the gain exactly balance, and there is net transparency at  $\lambda_{ext}$ . And the equation can be expressed by

$$\beta_{min} = \sigma_{abs}(\lambda_{ext}) / [\sigma_{abs}(\lambda_{ext}) + \sigma_{ext}(\lambda_{ext})] \quad (\text{S7})$$

$I_{min}$  represents the minimum absorbed pump intensity required to reach the threshold. It can be obtained from the following equation:

$$I_{min} = \beta_{min} \times I_{sat} \quad (\text{S8})$$
